## PARALLEL ANTIPORT MECHANISMS FOR $\text{Na}^+$ AND $\text{Cl}^-$ TRANSPORT IN HERBIVOROUS TELEOST INTESTINE

BY JAMES N. HOWARD AND GREGORY A. AHEARN

*Department of Zoology, 2538 The Mall, University of Hawaii at Manoa,  
Honolulu, HI 96822, USA*

*Accepted 22 September 1987*

### SUMMARY

Transport mechanisms for NaCl in intestinal brush border membrane vesicles (BBMV) of herbivorous, seawater-adapted tilapia, *Oreochromis mossambicus*, were investigated with a rapid filtration technique using  $^{22}\text{Na}^+$  and  $^{36}\text{Cl}^-$  as tracers. Evidence to support the existence of cotransport mechanisms ( $\text{Na}^+/\text{Cl}^-$  or  $\text{Na}^+/\text{K}^+/2\text{Cl}^-$ ) in tilapia intestinal BBMV was not found. An inwardly directed  $\text{Cl}^-$  gradient or KCl gradient did not stimulate the uptake of  $\text{Na}^+$  into tilapia intestinal BBMV. Furthermore, the uptake of  $\text{Na}^+$  under these conditions was not significantly affected by furosemide. Evidence was found to indicate the existence of  $\text{Na}^+/\text{H}^+$  and  $\text{Cl}^-/\text{HCO}_3^-$  antiport mechanisms for NaCl transport in tilapia intestinal BBMV. An outwardly directed proton gradient (pH 6.0 in, pH 7.5 out) stimulated the uptake of  $\text{Na}^+$  above that of the control (pH 7.5 in, pH 7.5 out). Exogenous amiloride ( $1\text{ mmol l}^{-1}$ ) significantly reduced  $\text{Na}^+$  uptake in the presence of an outwardly directed proton gradient. Apparent influxes of  $1\text{ mmol l}^{-1}$   $\text{Na}^+$  were ( $\text{nmol mg protein}^{-1} 15\text{ s}^{-1} \pm 1\text{ S.E.}$ ): control,  $1.46 \pm 0.09$ ; pH gradient,  $3.36 \pm 0.14$ ; pH gradient plus amiloride,  $1.55 \pm 0.05$ . The uptake of  $\text{Cl}^-$  was stimulated by outwardly directed  $\text{HCO}_3^-$  and  $\text{Cl}^-$  gradients in comparison with an outwardly directed gluconate gradient. Apparent influxes of  $10\text{ mmol l}^{-1}$   $\text{Cl}^-$  were ( $\text{nmol mg protein}^{-1} 15\text{ s}^{-1} \pm 1\text{ S.E.}$ ): gluconate,  $12.90 \pm 0.19$ ;  $\text{HCO}_3^-$ ,  $15.83 \pm 0.34$ ;  $\text{Cl}^-$ ,  $14.62 \pm 0.42$ . These results suggest that, in contrast to the cotransport mechanisms for NaCl that have been reported for other fish intestine, the herbivorous marine teleost, *Oreochromis mossambicus*, possesses dual antiport mechanisms for the transport of NaCl across its intestinal brush border membrane.

### INTRODUCTION

The intestine of marine teleost fish actively absorbs NaCl and water from the lumen as a part of the osmoregulatory process that takes place in these animals (Ando, 1981; Skadhauge, 1974). The transport mechanism by which NaCl traverses the brush border membrane of intestinal epithelial cells has not been studied in a wide variety of marine teleosts. There are currently four mechanisms by which the

Key words: brush border membrane vesicles, NaCl transport, cotransport, antiport, intestinal physiology, membrane transport, fish, tilapia, *Oreochromis mossambicus*.

electroneutral transport of NaCl across epithelial cell membranes is known to occur. One mechanism involves the cotransport of  $\text{Na}^+$ ,  $\text{K}^+$  and  $\text{Cl}^-$  and has been found in the shark rectal gland (Hannafin, Kinne-Saffran, Friedman & Kinne, 1983), flounder intestine (Eveloff, Field, Kinne & Murer, 1980; Musch *et al.* 1982) and other tissues (Epstein & Silva, 1985). A second mechanism of NaCl transport is  $\text{K}^+$ -independent cotransport of  $\text{Na}^+$  and  $\text{Cl}^-$ . This mechanism has been found in flounder urinary bladder (Stokes, 1984) and *Necturus* gallbladder (Ericson & Spring, 1982). A third mechanism of NaCl transport involves the action of dual antiporters:  $\text{Na}^+/\text{H}^+$  antiport and  $\text{Cl}^-/\text{OH}^-$  or  $\text{Cl}^-/\text{HCO}_3^-$  antiport. This mechanism has been found in rat and rabbit small intestines (Knickelbein, Aronson, Atherton & Dobbins, 1983; Knickelbein *et al.* 1985; Liedtke & Hopfer, 1982*a,b*) and *Necturus* proximal tubules (Seifter & Aronson, 1984). The final mechanism for NaCl transport involves the action of  $\text{Na}^+/\text{H}^+$  antiport and  $\text{Cl}^-/\text{formate}^-$  antiport. This mechanism has been found in rabbit renal cortex (Karniski & Aronson, 1985).

The transport of NaCl across the brush border membrane of the intestinal epithelium of marine teleosts could occur by any or all of these four mechanisms. The only transport mechanism that has been documented in marine teleost fish is the  $\text{Na}^+/\text{K}^+/2\text{Cl}^-$  mechanism in the winter flounder, *Pseudopleuronectes americanus* (Eveloff *et al.* 1980; Musch *et al.* 1982; Halm, Krasny & Frizzell, 1985). Whether other marine teleosts use this mechanism for NaCl transport or one of the other three has not been documented. This study was undertaken to determine the mechanism(s) of NaCl transport across the brush border membrane of intestinal epithelial cells in *Oreochromis mossambicus*, a herbivorous, euryhaline species of tilapia.

#### MATERIALS AND METHODS

Seawater-adapted adult tilapia (100–150 g) were captured locally and kept for 1 day prior to being used. Each animal was killed by a blow to the head, and the upper intestine removed and placed in 15 ml of buffer 1 [ $300\text{ mmol l}^{-1}$  mannitol;  $60\text{ mmol l}^{-1}$  Hepes/Tris,  $6\text{ mmol l}^{-1}$  EGTA,  $0.1\text{ mmol l}^{-1}$  phenylmethylsulphonyl-fluoride (PMSF), pH 7.4]. After the tissue had been removed from the animals, 60 ml of ice-cold deionized water was added to the 15 ml of buffer 1. This mixture was immediately homogenized for 15 s in a polytron. Magnesium chloride was added to the homogenate to give a final concentration of  $15\text{ mmol l}^{-1}$ , and the resulting mixture was kept on ice for 15 min. After 15 min the mixture was centrifuged at  $3000\text{ g}$  for 15 min. The supernatant was then centrifuged at  $27\,000\text{ g}$  for 30 min. This pellet was resuspended in 30 ml of ice-cold buffer 2 ( $60\text{ mmol l}^{-1}$  mannitol,  $12\text{ mmol l}^{-1}$  Hepes/Tris,  $6\text{ mmol l}^{-1}$  EGTA, pH 7.4) using a Potter–Elvehjem homogenizer. The magnesium chloride precipitation and two centrifugations were repeated on the resuspended pellet. The pellet resulting from this second set of spins was resuspended in 30 ml of ice-cold transport buffer (see figure legends for composition), and this mixture was centrifuged at  $27\,000\text{ g}$  for 30 min. The final pellet was resuspended in transport buffer at a protein concentration of approximately  $10\text{ mg ml}^{-1}$ .

Purity of the brush border membrane vesicles (BBMV) obtained from this procedure was determined by measuring the activity of membrane marker enzymes in the final pellet and in the homogenate. The activities of alkaline phosphatase,  $\text{Na}^+/\text{K}^+$ -stimulated ATPase,  $\text{K}^+$ -stimulated *p*-nitrophenylphosphatase, and cytochrome *c* oxidase were determined. Alkaline phosphatase activity was determined using Sigma chemical assay kit no. 104.  $\text{Na}^+/\text{K}^+$ -stimulated ATPase activity was determined using the coupled assay reaction of Berner, Kinne & Murer (1976).  $\text{K}^+$ -stimulated *p*-nitrophenylphosphatase activity was determined using the procedures of Arvan & Castle (1982). Cytochrome *c* oxidase activity was determined using the procedures of Cooperstein & Lazarow (1951).

The uptake of  $^{22}\text{Na}^+$  and  $^{36}\text{Cl}^-$  by BBMV was measured by the Millipore membrane filtration technique of Hopfer, Nelson, Perrotto & Isselbacher (1973). The compositions of the transport buffer inside the vesicles and the incubation medium outside the vesicles are indicated in each figure. Transport experiments were started by adding a volume of membrane vesicles (e.g. 20  $\mu\text{l}$ ) to a volume of radiolabelled incubation medium (e.g. 180  $\mu\text{l}$ ) to make a reaction mixture. At pre-determined incubation times (i.e. 15 s, 1.5, 3, 5 and 120 min) a known volume of the reaction mixture (20  $\mu\text{l}$ ) was removed and injected into 2 ml of ice-cold stop solution to stop the reaction. The composition of the stop solution varied according to the experimental conditions. Its composition was usually the same as the composition of the external control medium. The stop solution and reaction mixture sample were immediately filtered through a 0.65  $\mu\text{m}$  Millipore filter and washed with 8 ml of ice-cold stop solution. The filter was then placed in a scintillation vial and 5 ml of Beckman Ready Solv HP scintillation cocktail was added. All samples were counted in a Beckman LS-8100 scintillation counter. Each experiment consisted of a minimum of three replicates per time point per treatment. Each experiment was repeated at least once to verify the results. The results of only one of these repeated experiments are presented here as means  $\pm$  1 s.e. for each time point. Treatments were compared using Duncan's multiple range test.

The amount of protein present in each experiment was determined by the Coomassie blue dye binding assay (Bio-Rad) as developed by Bradford (1976). A mixture of human albumin (50  $\text{mg ml}^{-1}$ ) and human globulin (30  $\text{mg ml}^{-1}$ ) was used for the protein standard.

$^{22}\text{NaCl}$  was obtained from New England Nuclear (Boston, MA).  $\text{H}^{36}\text{Cl}$  was obtained from ICN Biomedicals, Inc. (Irvine, CA). Valinomycin, carbonyl cyanide *m*-chlorophenylhydrazone (CCCP), amiloride, furosemide and the protein standard were obtained from Sigma Chemical (St Louis, MO).

## RESULTS

### *Enzymatic purity of the vesicle preparation*

Comparisons of the activities of alkaline phosphatase,  $\text{Na}^+/\text{K}^+$ -stimulated ATPase,  $\text{K}^+$ -stimulated *p*-nitrophenylphosphatase and cytochrome *c* oxidase in the final pellet and the homogenate are presented in Table 1. Alkaline phosphatase is a

Table 1. *Enzymatic characterization of upper intestinal brush border membrane vesicles from seawater-adapted tilapia Oreochromis mossambicus*

| Enzyme                                                     | Activity                                             |                                                    | Purification factor | Enzyme recovery (%) | Number of animals |
|------------------------------------------------------------|------------------------------------------------------|----------------------------------------------------|---------------------|---------------------|-------------------|
|                                                            | Homogenate ( $\mu\text{mol mg}^{-1} \text{h}^{-1}$ ) | Vesicles ( $\mu\text{mol mg}^{-1} \text{h}^{-1}$ ) |                     |                     |                   |
| Alkaline phosphatase                                       | $2.71 \pm 0.09$                                      | $32.58 \pm 0.20$                                   | $12.02 \pm 0.31$    | 29.8                | 3                 |
| $\text{Na}^+/\text{K}^+$ -ATPase                           | $2.0 \pm 0.13$                                       | $3.2 \pm 0.37$                                     | $1.62 \pm 0.09$     | 4.4                 | 4                 |
| $\text{K}^+$ -stimulated <i>p</i> -nitrophenyl-phosphatase | $0.265 \pm 0.038$                                    | $0.269 \pm 0.003$                                  | $1.02 \pm 0.19$     | 2.7                 | 4                 |
| Cytochrome <i>c</i> oxidase                                | $1.27 \pm 0.20$                                      | $1.11 \pm 0.02$                                    | $0.87 \pm 0.13$     | 2.4                 | 4                 |

Values are means  $\pm$  S.E.

Enzyme activities are in  $\mu\text{mol}$  product released  $\text{mg protein}^{-1} \text{h}^{-1}$ .

Purification factors are means of individual vesicles activities  $\div$  individual homogenate activities.

Enzyme recoveries represent comparisons between homogenate and vesicle contents.

Measurements were performed on different membrane preparations.

marker for the brush border membrane, and its activity was increased 12-fold in the final pellet.  $\text{Na}^+/\text{K}^+$ -stimulated ATPase and  $\text{K}^+$ -stimulated *p*-nitrophenylphosphatase are markers for basolateral membranes, and their activities were increased 1.62- and 1.02-fold, respectively, in the final pellet. Cytochrome *c* oxidase is a marker for mitochondrial membranes, and its activity was increased 0.87-fold in the final pellet. These results indicate that the final pellet was enriched in brush border membranes and was not appreciably contaminated with either basolateral or mitochondrial membranes. It should be noted here that, since the final pellet was not 100 % brush border membranes, the transport mechanisms that were being investigated here could be resident in some other minor contaminating membrane population (basolateral, mitochondrial, etc.), as well as being in the brush border membrane population.

#### *Osmotic reactivity of the vesicle preparation*

To substantiate that BBMV were closed and osmotically reactive, the equilibrium uptake of  $1 \text{ mmol l}^{-1} \text{Na}^+$  was measured in the presence of increasing external raffinose concentrations (Fig. 1). If the vesicles were osmotically reactive, then as the external concentration of raffinose was increased the vesicles should shrink and hold less isotope. As shown in Fig. 1, the regression of  $\text{Na}^+$  uptake on the reciprocal of medium osmolarity was significant ( $P < 0.01$ ), indicating that the vesicles were osmotically reactive. The estimate of the slope is  $0.64 \pm 0.04 \text{ nmol mg protein}^{-1} \text{mosmol}^{-1}$ , and the estimate of the intercept is  $1.04 \pm 0.09 \text{ nmol mg protein}^{-1}$ . The intercept indicates the amount of  $\text{Na}^+$  uptake that is independent of intravesicular space (binding). A considerable amount of the  $\text{Na}^+$  uptake in Fig. 1 is due to the

binding of  $\text{Na}^+$  to the vesicles. For example, at  $300 \text{ mosmol l}^{-1}$ , 33 % of the  $\text{Na}^+$  uptake is due to binding.

#### *Test for the cotransport models*

To test for the existence of the  $\text{Na}^+/\text{Cl}^-$  cotransport model or the  $\text{Na}^+/\text{K}^+/2\text{Cl}^-$  cotransport model in BBMV of tilapia upper intestine, the uptake of  $\text{Na}^+$  was measured in the presence of different ion gradients. As shown in Fig. 2, the uptake of  $\text{Na}^+$  was not stimulated by a  $\text{Cl}^-$  gradient or by a KCl gradient into the vesicles when compared with the control (gluconate). These gradients would be expected to stimulate  $\text{Na}^+$  uptake if the mechanism of  $\text{Na}^+$  uptake were  $\text{Na}^+/\text{Cl}^-$  cotransport or  $\text{Na}^+/\text{K}^+/2\text{Cl}^-$  cotransport. Also, the uptake of  $\text{Na}^+$  in the presence of a KCl gradient was not significantly affected by furosemide, which is known to affect the  $\text{Na}^+/\text{K}^+/2\text{Cl}^-$  cotransport mechanism (Epstein & Silva, 1985; Hannafin *et al.* 1983). These results provide strong evidence against the presence of these two cotransport mechanisms for NaCl in the apical membrane of tilapia intestinal epithelial cells.

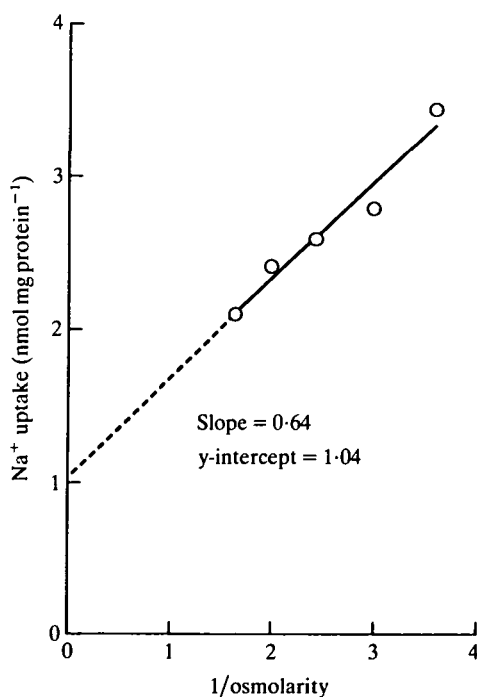

Fig. 1. The effect of increasing osmolarity on the uptake of sodium into brush border membrane vesicles from tilapia upper intestine. The vesicles contained  $50 \text{ mmol l}^{-1}$  mannitol,  $50 \text{ mmol l}^{-1}$  tetramethylammonium chloride (TMACl) and  $20 \text{ mmol l}^{-1}$  Hepes/Tris, pH 7.0. The reaction medium contained  $50 \text{ mmol l}^{-1}$  mannitol,  $49 \text{ mmol l}^{-1}$  TMACl,  $1 \text{ mmol l}^{-1}$  NaCl,  $20 \text{ mmol l}^{-1}$  Hepes/Tris, pH 7.0 and increasing concentrations of raffinose.

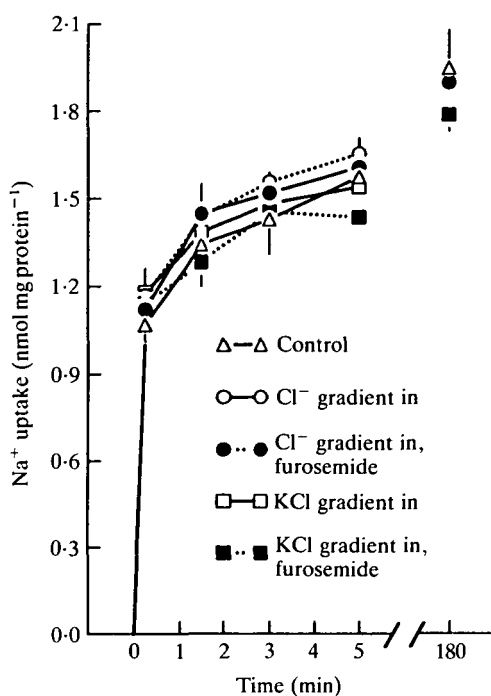

Fig. 2. The effect of chloride, potassium chloride and furosemide on the uptake of sodium into brush border membrane vesicles from tilapia upper intestine. The vesicles contained  $200 \text{ mmol l}^{-1}$  tetramethylammonium (TMA) gluconate,  $100 \text{ mmol l}^{-1}$  potassium gluconate,  $12 \text{ mmol l}^{-1}$  Hepes/Tris, pH 7.4 plus  $10 \mu\text{mol l}^{-1}$  CCCP. The reaction media contained  $0.5 \text{ mmol l}^{-1}$  sodium gluconate and were the same as the vesicle medium for the control (triangles) and  $\text{Cl}^{-}$  treatments (open and closed circles) except that the  $\text{Cl}^{-}$  treatments had  $100 \text{ mmol l}^{-1}$  KCl in place of  $100 \text{ mmol l}^{-1}$  potassium gluconate. The KCl treatments had  $100 \text{ mmol l}^{-1}$  TMA gluconate,  $100 \text{ mmol l}^{-1}$  potassium gluconate,  $100 \text{ mmol l}^{-1}$  KCl and  $12 \text{ mmol l}^{-1}$  Hepes/Tris, pH 7.4 (open and closed squares). To test the effect of  $0.5 \text{ mmol l}^{-1}$  furosemide (closed symbols) the vesicles were pre-incubated with furosemide for 1 min before uptake was started.

#### *Test for the antiport models*

With evidence to suggest that the cotransport models discussed above were not the mechanisms of  $\text{NaCl}$  transport in tilapia intestinal BBMVs, experiments to test for the existence of ion antiporters in tilapia intestinal BBMVs were performed next. To test for the presence of a  $\text{Na}^{+}/\text{H}^{+}$  antiporter, the uptake of  $\text{Na}^{+}$  was measured in the presence and absence of a proton gradient directed out of the vesicles. The internal and external solutions for this experiment did not contain  $\text{Cl}^{-}$  salts. Fig. 3 shows that the uptake of  $\text{Na}^{+}$  in the presence of an outwardly directed proton gradient (pH 6.0 in, pH 7.5 out) was much greater than that of the control (pH 7.5 in, pH 7.5 out). This stimulation was inhibited by  $1 \text{ mmol l}^{-1}$  amiloride which is known to inhibit  $\text{Na}^{+}/\text{H}^{+}$  antiporters. Apparent influxes of  $1 \text{ mmol l}^{-1}$   $\text{Na}^{+}$  were ( $\text{nmol mg protein}^{-1} 15 \text{ s}^{-1} \pm 1 \text{ s.e.}$ ): control,  $1.46 \pm 0.09$ ; pH gradient,  $3.36 \pm 0.14$ ; pH

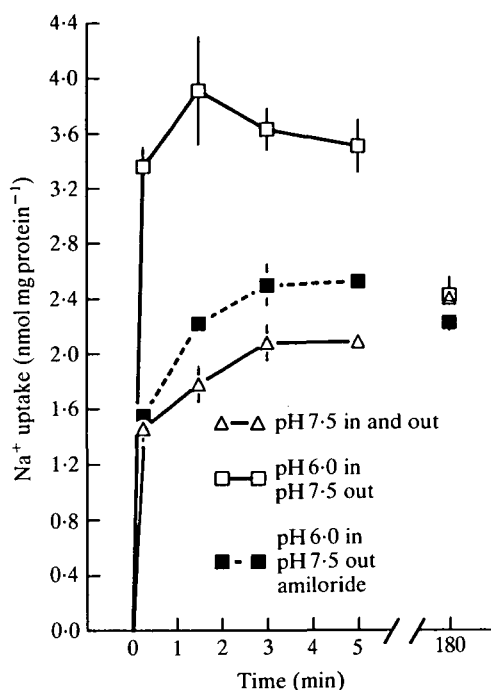

Fig. 3. The effect of a proton gradient and amiloride on the uptake of sodium into brush border membrane vesicles from tilapia upper intestine. The vesicles contained the following:  $100 \text{ mmol l}^{-1}$  tetramethylammonium (TMA) gluconate,  $100 \text{ mmol l}^{-1}$  potassium gluconate, valinomycin ( $15 \mu\text{g mg protein}^{-1}$ ) and either  $50 \text{ mmol l}^{-1}$  Hepes/Tris, pH 7.5 (triangles) or  $50 \text{ mmol l}^{-1}$  Mes/Tris, pH 6.0 (squares). The reaction media contained  $1 \text{ mmol l}^{-1}$  sodium gluconate,  $100 \text{ mmol l}^{-1}$  TMA gluconate,  $100 \text{ mmol l}^{-1}$  potassium gluconate,  $50 \text{ mmol l}^{-1}$  Hepes/Tris, pH 7.5. The amiloride treatment (closed squares) contained  $1 \text{ mmol l}^{-1}$  amiloride in addition to the above.

gradient plus amiloride,  $1.55 \pm 0.05$ . At 15 s the pH gradient treatment was significantly different ( $P < 0.05$ , Duncan's multiple range test) from the control, while the pH gradient plus amiloride treatment was not. The various treatments in this experiment were short-circuited with valinomycin so that it could not be argued that the stimulation was due to diffusion potentials created by the diffusion of protons out of the vesicles, which in turn set up an electrical gradient that attracted  $\text{Na}^+$  into the vesicles. These results support the existence of a  $\text{Na}^+/\text{H}^+$  antiporter in tilapia intestinal BBMVs.

To test for the existence of a  $\text{Cl}^-$ /anion antiporter in tilapia intestinal BBMVs, the uptake of  $\text{Cl}^-$  into vesicles containing different outwardly directed anion gradients was measured. The internal and external solutions for this experiment did not contain  $\text{Na}^+$  salts. Fig. 4 indicates that the uptake of  $\text{Cl}^-$  into these vesicles was stimulated by both an outwardly directed  $\text{HCO}_3^-$  gradient and an outwardly directed  $\text{Cl}^-$  gradient. Apparent influxes of  $10 \text{ mmol l}^{-1} \text{Cl}^-$  were ( $\text{nmol mg protein}^{-1} 15 \text{ s}^{-1} \pm 1 \text{ s.e.}$ ): gluconate,  $12.90 \pm 0.19$ ;  $\text{HCO}_3^-$ ,  $15.83 \pm 0.34$ ;

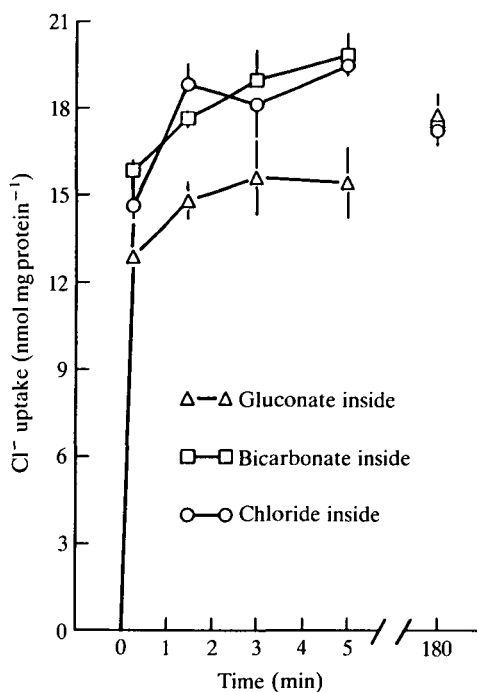

Fig. 4. The effect of internal anions on chloride uptake into brush border membrane vesicles from tilapia upper intestine. The vesicles contained  $200 \text{ mmol l}^{-1}$  tetramethylammonium (TMA) gluconate,  $12 \text{ mmol l}^{-1}$  Hepes/Tris, pH 7.7, valinomycin ( $15 \mu\text{g mg protein}^{-1}$ ) and one of the following:  $50 \text{ mmol l}^{-1}$  potassium gluconate (triangles),  $50 \text{ mmol l}^{-1}$   $\text{KHCO}_3$  (squares) or  $50 \text{ mmol l}^{-1}$  KCl (circles). The reaction medium was the same for all treatments and consisted of  $190 \text{ mmol l}^{-1}$  TMA gluconate,  $50 \text{ mmol l}^{-1}$  potassium gluconate,  $10 \text{ mmol l}^{-1}$  TMACl and  $12 \text{ mmol l}^{-1}$  Hepes/Tris, pH 7.7.

$\text{Cl}^-$ ,  $14.62 \pm 0.42$ . At 15 s the  $\text{HCO}_3^-$  and  $\text{Cl}^-$  treatments were significantly different ( $P < 0.05$ , Duncan's multiple range test) from the control. As discussed above for the  $\text{Na}^+/\text{H}^+$  antiport experiment, the treatments were short-circuited with valinomycin so that electrical coupling can be ruled out as the reason for the stimulation of  $\text{Cl}^-$  uptake in the  $\text{HCO}_3^-$  and  $\text{Cl}^-$  treatments. These results support the existence of a  $\text{Cl}^-/\text{HCO}_3^-$  antiporter in tilapia intestinal BBMVs. Overall, this supports the  $\text{Na}^+/\text{H}^+:\text{Cl}^-/\text{HCO}_3^-$  antiport model as the mechanism of NaCl transport in tilapia intestinal BBMVs.

#### DISCUSSION

Early experiments which strongly suggested the existence of a mechanism capable of mediating electroneutral NaCl absorption in epithelia came from the work of Diamond (1962, 1964), Wheeler (1963) and Dietschy (1964). Their studies showed that  $\text{Na}^+$  and  $\text{Cl}^-$  were both actively absorbed by fish and rabbit gallbladder at nearly



equal rates. They also found that the replacement of  $\text{Na}^+$  by nonabsorbed cations abolished active  $\text{Cl}^-$  absorption, and that the replacement of  $\text{Cl}^-$  by nonabsorbed anions abolished active  $\text{Na}^+$  absorption. This early work did not determine the site(s) of interaction between  $\text{Na}^+$  and  $\text{Cl}^-$  on the gallbladder epithelial cell membrane. Studies by Frizzell, Dugas & Schultz (1975) and Cremaschi & Henin (1975) determined that the site of coupling was at the brush border membrane. These early studies were made using whole-tissue techniques (e.g. Ussing chambers). A drawback of whole-tissue techniques is that they cannot easily be used to distinguish between symport and antiport mechanisms because the investigator has little, if any, control over what is inside the cell. Later studies used membrane vesicle techniques to delineate further the mechanisms of vertebrate  $\text{NaCl}$  transport. One of the first transport mechanisms to become widely documented in vesicles from a number of different tissues was  $\text{Na}^+/\text{K}^+/2\text{Cl}^-$  transport (Epstein & Silva, 1985; Eveloff *et al.* 1980; Hannafin *et al.* 1983; Musch *et al.* 1982; Halm *et al.* 1985). Since the discovery of the  $\text{Na}^+/\text{K}^+/2\text{Cl}^-$  mechanism other investigators have proposed different models for  $\text{NaCl}$  transport in epithelial tissues. These models involve the action of  $\text{Na}^+/\text{H}^+$ ,  $\text{Cl}^-/\text{OH}^-$ ,  $\text{Cl}^-/\text{HCO}_3^-$  or  $\text{Cl}^-/\text{formate}^-$  antiporters (Karniski & Aronson, 1985; Knickelbein *et al.* 1983, 1985; Liedtke & Hopfer, 1982*a,b*; Seifter & Aronson, 1984). Both symport and antiport models can be used to explain coupled electroneutral  $\text{NaCl}$  transport in the tissues that have been studied.

For marine teleosts the transport of  $\text{NaCl}$  across the intestinal epithelium is an important part of the osmoregulatory process that these animals perform in order to survive in the marine environment. Prior to this study, the only membrane vesicle work which had been conducted on  $\text{NaCl}$  transport in the intestine of a marine teleost had been done on the winter flounder, *Pseudopleuronectes americanus* (Eveloff *et al.* 1980). This study disclosed that  $\text{Na}^+$  uptake into intestinal BBMV was stimulated by an inwardly directed  $\text{Cl}^-$  gradient, and this stimulation was inhibited by furosemide. It did not determine if this  $\text{NaCl}$  cotransport was  $\text{K}^+$ -dependent or  $\text{K}^+$ -independent because all the treatments had  $\text{K}^+$  present. Later studies by Musch *et al.* (1982) and Halm *et al.* (1985) have shown that a  $\text{Na}^+/\text{K}^+/2\text{Cl}^-$  cotransport mechanism is present in winter flounder intestine. To test for  $\text{NaCl}$  cotransport in tilapia intestinal BBMV,  $\text{Na}^+$  uptake was measured in the presence of inwardly directed  $\text{Cl}^-$  and  $\text{KCl}$  gradients. The conditions used were similar to those used by Knickelbein *et al.* (1985) to test for  $\text{NaCl}$  cotransport in rabbit ileal BBMV. The results in Fig. 2 indicate that neither  $\text{Na}^+/\text{Cl}^-$  nor  $\text{Na}^+/\text{K}^+/2\text{Cl}^-$  cotransport was present in tilapia intestinal BBMV, since  $\text{Na}^+$  uptake was not stimulated by an inwardly directed  $\text{Cl}^-$  or  $\text{KCl}$  gradient. Furosemide also had no effect on  $\text{Na}^+$  uptake (Fig. 2).

From Fig. 3 it can be seen that a  $\text{Na}^+/\text{H}^+$  antiport mechanism exists in tilapia intestinal BBMV. This transporter has been documented in a wide variety of cells, including erythrocytes, lymphocytes, ova, sperm, skeletal muscle, cardiac muscle, neurones, capillary endothelium, fibroblasts, renal tubular cells, and intestinal and gallbladder epithelial cells (Mahnensmith & Aronson, 1985). The  $\text{Na}^+/\text{H}^+$  antiporter has also been implicated in the following physiological processes: regulation of intracellular pH, control of cell growth and proliferation, metabolic responses to

hormones such as insulin and glucocorticoids, regulation of cell volume, and the transepithelial transport of NaCl *via*  $\text{Na}^+/\text{H}^+ : \text{Cl}^-/\text{HCO}_3^-$  antiport (Mahnensmith & Aronson, 1985).

Fig. 4 indicates that a  $\text{Cl}^-/\text{HCO}_3^-$  antiport mechanism exists in tilapia intestinal BBMVs. This transporter has been documented in rabbit small intestine by Knickelbein *et al.* (1985). A  $\text{Cl}^-/\text{OH}^-$  antiporter has been documented by Liedtke & Hopfer (1982b) in rat small intestine. Both  $\text{Cl}^-/\text{HCO}_3^-$  and  $\text{Cl}^-/\text{OH}^-$  exchange have also been documented in erythrocytes (Scarpa, Cecchetto & Azzone, 1970).

A possible mechanism for the coupling of the  $\text{Na}^+/\text{H}^+$  antiporter and the  $\text{Cl}^-/\text{HCO}_3^-$  antiporter could be *via* the activity of carbonic anhydrase. Carbonic anhydrase facilitates the production of carbonic acid ( $\text{H}_2\text{CO}_3$ ) from  $\text{CO}_2$  and  $\text{H}_2\text{O}$ . Carbonic acid then dissociates into  $\text{HCO}_3^-$  and  $\text{H}^+$ , thus providing substrates for the antiporters. The net effect of this coupling mechanism is to move  $\text{CO}_2$  out of the cell into the intestinal lumen and to move  $\text{Na}^+$  and  $\text{Cl}^-$  electroneutrally from the lumen into the cell. This provides a means for the cell to get rid of metabolic  $\text{CO}_2$  while absorbing NaCl. A model of this coupling mechanism can be found in the paper by Knickelbein *et al.* (1985).

The reason for the presence of  $\text{Na}^+/\text{K}^+ / 2\text{Cl}^-$  symport in winter flounder and  $\text{Na}^+/\text{H}^+ : \text{Cl}^-/\text{HCO}_3^-$  antiport in tilapia is not yet understood. It should be noted here that the presence of  $\text{Na}^+/\text{H}^+ : \text{Cl}^-/\text{HCO}_3^-$  antiport in winter flounder has not been ruled out. In fact, the paper by Halm *et al.* (1985) suggests that there is some other mechanism for the transport of NaCl present in the brush border membrane of winter flounder intestinal epithelial cells. This mechanism could be  $\text{Na}^+/\text{H}^+ : \text{Cl}^-/\text{HCO}_3^-$  antiport. Eveloff *et al.* (1980) have already shown that  $\text{Na}^+/\text{H}^+$  antiport is present in winter flounder intestinal BBMVs. All that remains to be shown is that  $\text{Cl}^-/\text{HCO}_3^-$  antiport is present too. While the exact physiological details of NaCl transport in winter flounder intestinal epithelial cells are still somewhat unclear, our present experiments suggest that NaCl cotransport mechanisms are not present in tilapia intestinal epithelial cells. The lack of cotransport mechanisms in tilapia intestinal BBMVs could be related to the diet and/or salinity-tolerance of this species. Tilapia are euryhaline herbivores, whereas winter flounder are stenohaline carnivores.

This study was supported by NSF grant number PCM 83-19973.

#### REFERENCES

- ANDO, M. (1981). Effects of ouabain on chloride movements across the seawater eel intestine. *J. comp. Physiol.* **145**, 73–79.
- ARVAN, P. & CASTLE, J. D. (1982). Plasma membrane of the rat parotid gland: Preparation and partial characterization of a fraction containing the secretory surface. *J. Cell Biol.* **95**, 8–19.
- BERNER, W., KINNE, R. & MURER, H. (1976). Phosphate transport into brush border membrane vesicles isolated from rat small intestine. *Biochem. J.* **160**, 467–474.

- BRADFORD, M. M. (1976). A rapid and sensitive method for the quantitation of microgram quantities of protein utilizing the principle of protein-dye binding. *Analyt. Biochem.* **72**, 248–254.
- COOPERSTEIN, S. J. & LAZAROW, A. (1951). A microspectrophotometric method for the determination of cytochrome oxidase. *J. biol. Chem.* **189**, 665–670.
- CREMASCHI, D. & HENIN, S. (1975). Na and Cl transepithelial routes in rabbit gallbladder. Tracer analysis of the transports. *Pflügers Arch. ges. Physiol.* **361**, 33–41.
- DIAMOND, J. M. (1962). The mechanism of solute transport by the gallbladder. *J. Physiol., Lond.* **161**, 474–502.
- DIAMOND, J. M. (1964). Transport of salt and water in rabbit and guinea pig gallbladder. *J. gen. Physiol.* **48**, 1–14.
- DIETSCHY, J. M. (1964). Water and solute transport across the wall of the everted rabbit gallbladder. *Gastroenterology* **47**, 395–408.
- EPSTEIN, F. H. & SILVA, P. (1985). Na–K–Cl cotransport in chloride-transporting epithelia. *Ann. N.Y. Acad. Sci.* **456**, 187–197.
- ERICSON, A. & SPRING, K. R. (1982). Coupled NaCl entry into *Necturus* gallbladder epithelial cells. *Am. J. Physiol.* **243**, C140–145.
- EVELOFF, J., FIELD, M., KINNE, R. & MURER, H. (1980). Sodium-cotransport systems in intestine and kidney of the winter flounder. *J. comp. Physiol.* **135**, 175–182.
- FRIZZELL, R. A., DUGAS, M. & SCHULTZ, S. G. (1975). Sodium chloride transport by rabbit gallbladder: direct evidence for a coupled NaCl influx process. *J. gen. Physiol.* **65**, 769–795.
- HALM, D., KRASNY, E., JR & FRIZZELL, R. (1985). Electrophysiology of flounder intestinal mucosa. II. Relation of the electrical potential profile to coupled NaCl absorption. *J. gen. Physiol.* **85**, 865–883.
- HANNAFIN, J., KINNE-SAFFRAN, E., FRIEDMAN, D. & KINNE, R. (1983). Presence of a sodium–potassium chloride cotransport system in the rectal gland of *Squalus acanthias*. *J. Membr. Biol.* **75**, 73–83.
- HOPFER, U., NELSON, K., PERROTTO, J. & ISSELBACHER, K. J. (1973). Glucose transport in isolated brush border membrane from rat small intestine. *J. biol. Chem.* **248**, 25–32.
- KARNISKI, L. P. & ARONSON, P. S. (1985). Chloride/formate exchange with formic acid recycling: a mechanism of active chloride transport across epithelial membranes. *Proc. natn. Acad. Sci. U.S.A.* **82**, 6362–6365.
- KNICKELBEIN, R., ARONSON, P. S., ATHERTON, W. & DOBBINS, J. W. (1983). Sodium and chloride transport across rabbit ileal brush border. I. Evidence for Na–H exchange. *Am. J. Physiol.* **245**, G504–510.
- KNICKELBEIN, R., ARONSON, P. S., SCHRON, C. M., SEIFTER, J. & DOBBINS, J. W. (1985). Sodium and chloride transport across rabbit ileal brush border. II. Evidence for Cl–HCO<sub>3</sub> exchange and mechanism of coupling. *Am. J. Physiol.* **249**, G236–245.
- LIEDTKE, C. M. & HOPFER, U. (1982a). Mechanism of Cl<sup>–</sup> translocation across small intestinal brush-border membrane. I. Absence of Na<sup>+</sup>–Cl<sup>–</sup> cotransport. *Am. J. Physiol.* **242**, G263–271.
- LIEDTKE, C. M. & HOPFER, U. (1982b). Mechanism of Cl<sup>–</sup> translocation across small intestinal brush-border membrane. II. Demonstration of Cl<sup>–</sup>–OH<sup>–</sup> exchange and Cl<sup>–</sup> conductance. *Am. J. Physiol.* **242**, G272–280.
- MAHNENSMITH, R. L. & ARONSON, P. S. (1985). The plasma membrane sodium–hydrogen exchanger and its role in physiological and pathophysiological processes. *Circulation Res.* **57**, 773–788.
- MUSCH, M. W., ORELLANA, S. A., KIMBERG, L. S., FIELD, M., HALM, D. R., KRASNY, E. J., JR & FRIZZELL, R. A. (1982). Na<sup>+</sup>–K<sup>+</sup>–Cl<sup>–</sup> co-transport in the intestine of a marine teleost. *Nature, Lond.* **300**, 351–353.
- SCARPA, A., CECCHETTO, A. & AZZONE, G. F. (1970). The mechanism of anion translocation and pH equilibration in erythrocytes. *Biochim. biophys. Acta* **219**, 179–188.
- SEIFTER, J. L. & ARONSON, P. S. (1984). Cl<sup>–</sup> transport via anion exchange in *Necturus* renal microvillus membranes. *Am. J. Physiol.* **247**, F888–895.

- SKADHAUGE, E. (1974). Coupling of transmural flows of NaCl and water in the intestine of the eel (*Anguilla anguilla*). *J. exp. Biol.* **60**, 535–546.
- STOKES, J. B. (1984). Sodium chloride absorption by the urinary bladder of the winter flounder. A thiazide-sensitive electrically neutral transport system. *J. clin. Invest.* **74**, 7–16.
- WHEELER, H. O. (1963). Transport of electrolytes and water across wall of rabbit gallbladder. *Am. J. Physiol.* **205**, 427–438.
